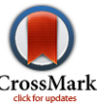

Correction

# Correction: Limits of Feedback Control in Bacterial Chemotaxis

## The PLOS Computational Biology Staff

There are multiple errors in this article.

In the Results section, subsection Analytical Model of the Drift Velocity as a Function of CheY-P Concentration, there is an error in Equation 3. The term  $e^{-t/\tau_{R0}}$  is incorrect. It should read  $e^{-t/\tau_{R0}}$ . Please view the complete correct equation here:

$$V_D = \frac{\tau_{R0}'}{1 + \tau_{R0}/\tau} \frac{v(1 - TB_0)}{d} \int_0^\infty \frac{e^{-t/\tau_{R0}}}{\tau_{R0}} f dt \quad (3)$$

$$\approx \frac{\tau_{R0}'}{1 + \tau_{R0}/\tau} \frac{(1 - TB_0)v^2 Ng}{d}$$

In the Methods section, subsection Linear Expansion, the inline equation in the first paragraph is incorrect. Please view the complete correct equation here:

$$F(t, s, F_i) = F_0 + (F_i - F_0)e^{-t/\tau} + se^{-t/\tau} \int_0^t e^{u/\tau} f(u) du$$

In the Methods section, subsection Linear Expansion, the inline equation on line 30 is incorrect. Please view the complete correct equation here:

$$\langle t | s, F_i \rangle \cong \tau_{R0} \left[ 1 - \lambda_{R0}' \int_0^\infty e^{-t/\tau_{R0}} \Delta F(t | s, F_i) dt \right] + O(\Delta F^2)$$

In the Methods Section, subsection Motor Adaptations:

The subscript in the definition of the parameter  $k_{on} = 0.025 \text{ s}^{-1}$  is incorrect. The correct subscript should be:  $k_{off} = 0.025 \text{ s}^{-1}$

The expression: “ $\Delta n = 4.16$ ,  $\epsilon_{3,1} = 1.96$  to reproduce [19] (Figure 5B insert).  $k_{off} = 0.0063 \text{ s}^{-1}$ .” is incorrect. The correction expression should be: “ $\Delta n = 2.74$ ,  $\epsilon_{3,1} = 2.31$  to reproduce [19] (Figure 5A).  $k_{on} = 0.0063 \text{ s}^{-1}$ .”

In the Supporting Information Legends:

In the legend for Figure S4,  $k_{off}$  should be  $k_{on}$ .

In the legend for Figure S5,  $k_{off} = 0.0013 \text{ s}^{-1}$  should be  $k_{on} = 0.0013 \text{ s}^{-1}$ .

## Reference

- Dufour YS, Fu X, Hernandez-Nunez L, Emonet T (2014) Limits of Feedback Control in Bacterial Chemotaxis. PLoS Comput Biol 10(6): e1003694. doi:10.1371/journal.pcbi.1003694

**Citation:** The PLOS Computational Biology Staff (2014) Correction: Limits of Feedback Control in Bacterial Chemotaxis. PLoS Comput Biol 10(12): e1004069. doi:10.1371/journal.pcbi.1004069

**Published:** December 11, 2014

**Copyright:** © 2014 The PLOS Computational Biology Staff. This is an open-access article distributed under the terms of the Creative Commons Attribution License, which permits unrestricted use, distribution, and reproduction in any medium, provided the original author and source are credited.
